# Supplementary material for: Copper catalyzed ring opening copolymerization of a vinyl cyclopropane and methyl methacrylate
Source: Royal Society of Chemistry journal article supplement (doi:10.1039/c3ra23291c), 2013-01-01
Supplement: c3ra23291c.pdf [file c3ra23291c.pdf]

## SUPPLEMENTARY SECTION

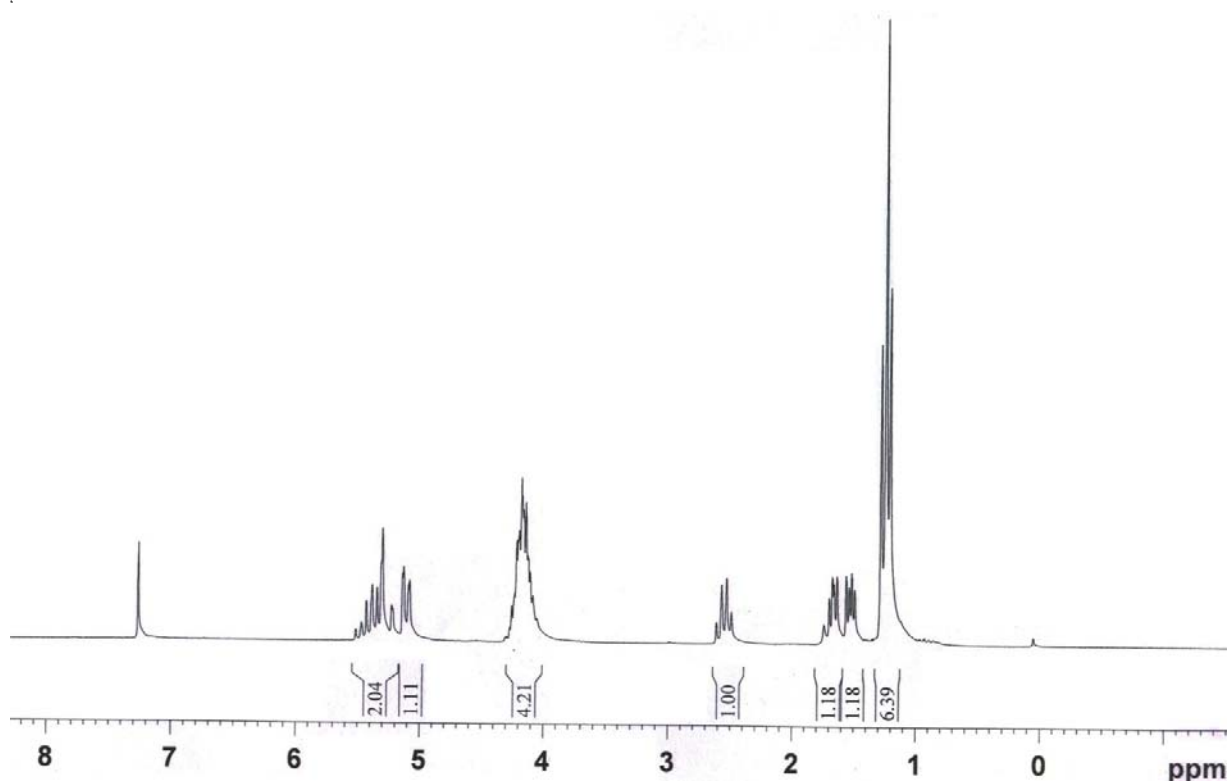

Figure 1S:  $^1\text{H}$  NMR spectrum of 1,1-bis(ethoxycarbonyl)-2-vinyl cyclopropane (BCVCP)

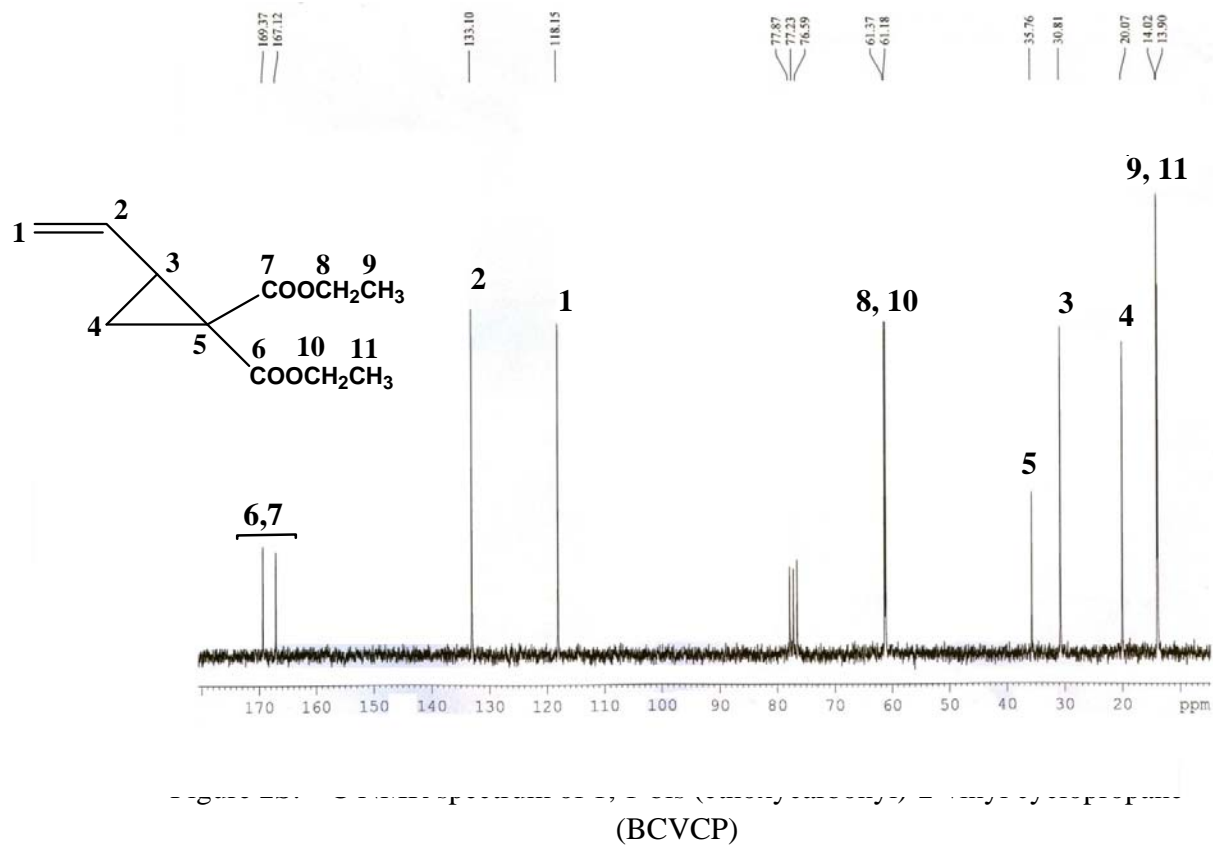

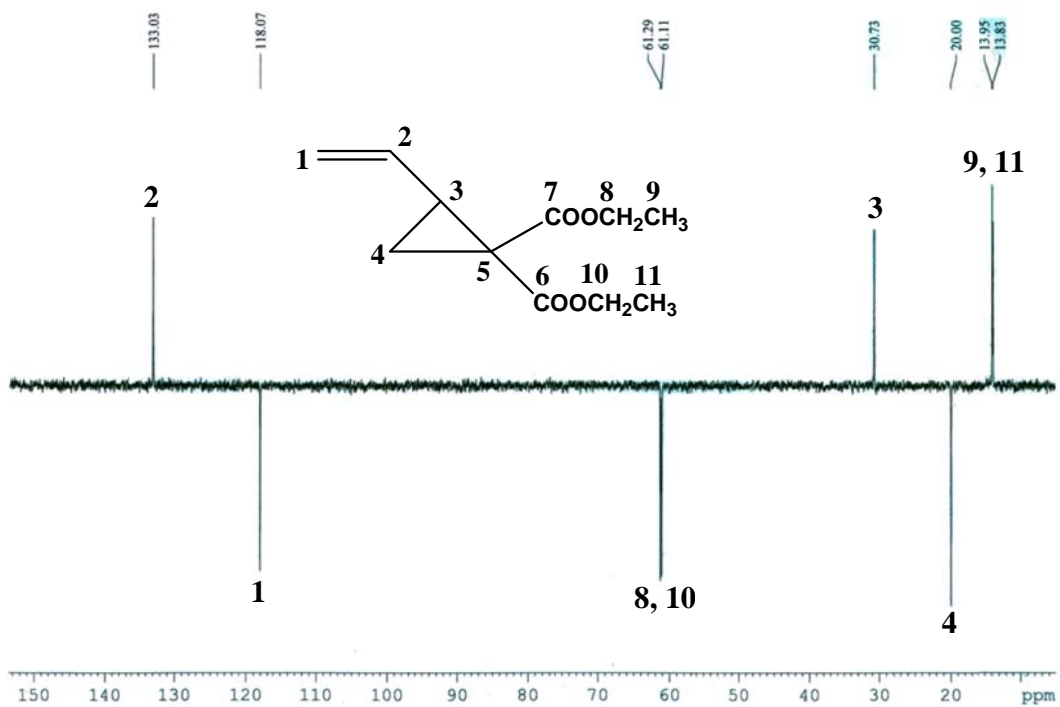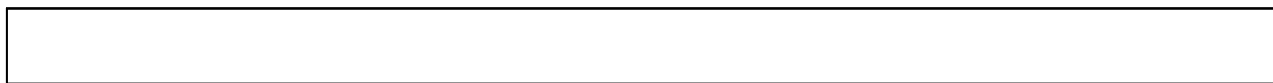

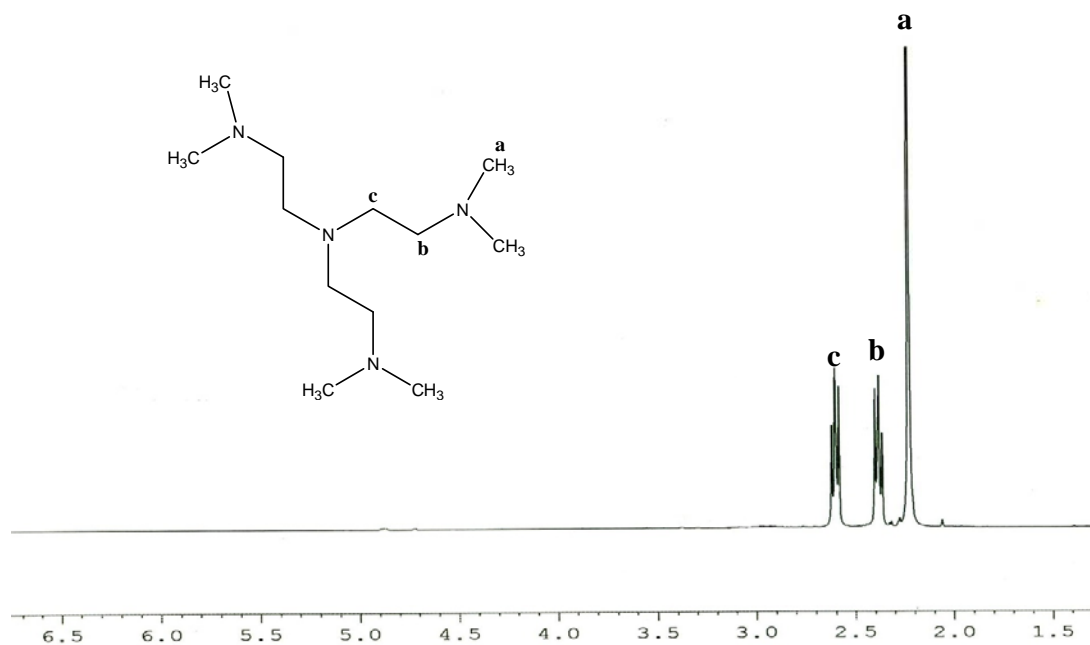

Figure 4S:  $^1\text{H}$  NMR spectrum of Tris (dimethylaminoethyl) amine ( $\text{Me}_6\text{-TREN}$ )

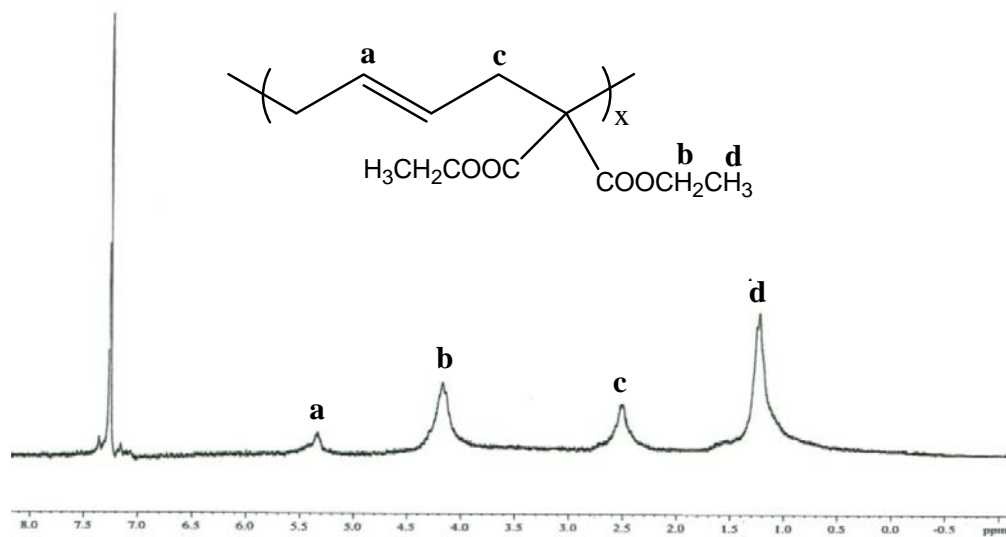

Figure 5S:  $^1\text{H}$  NMR spectrum (in  $\text{CDCl}_3$ ) of poly (1, 1-bis (ethoxycarbonyl)-2-vinyl cyclopropane (PBCVCP) by  $\text{CuBr}/\text{Me}_6\text{-TREN}$  (Table 1, Expt. No. 2)

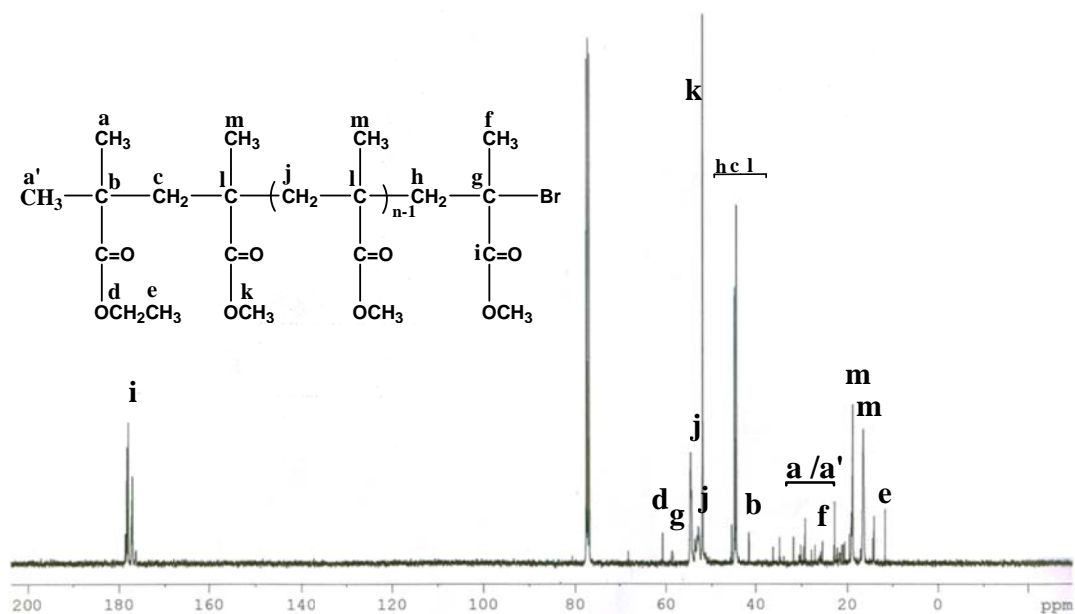

Copolymer of BCVCP and MMA prepared via conventional radical polymerization (50: 50)

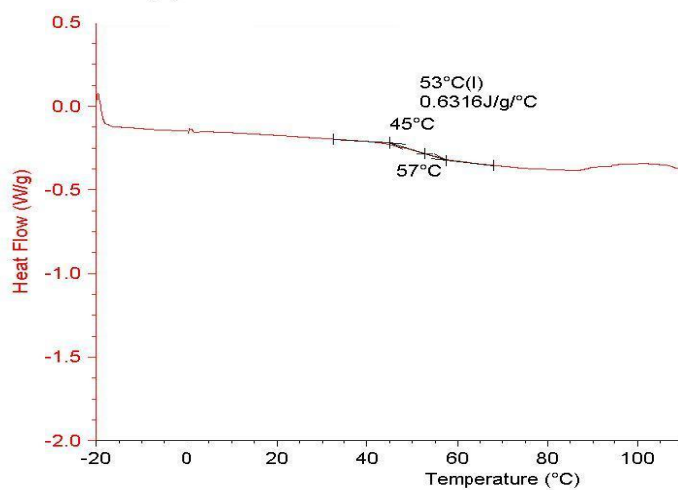

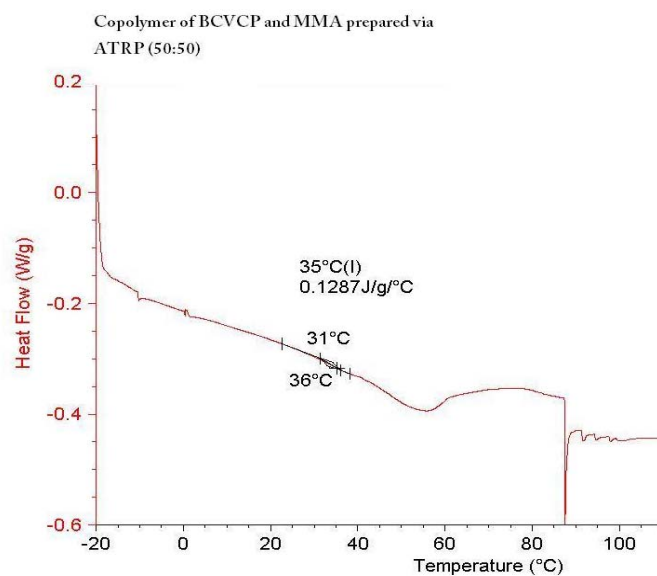

Figure 8S: DSC curve of copolymer prepared via ATRP method in (MMA: BCVCP= 50: 50) feed composition (Table 2, Expt. No 3)

Figure 9S: TGA curves of copolymer of BCVCP and MMA prepared at feed composition of MMA: BCVCP= 50: 50
